# Supplementary figures and images for: Genome-wide mapping of alternative splicing in Arabidopsis thaliana
Source: HighWire-hosted journal article supplement (doi:10.1101/gr.093302.109), 2009-10-26

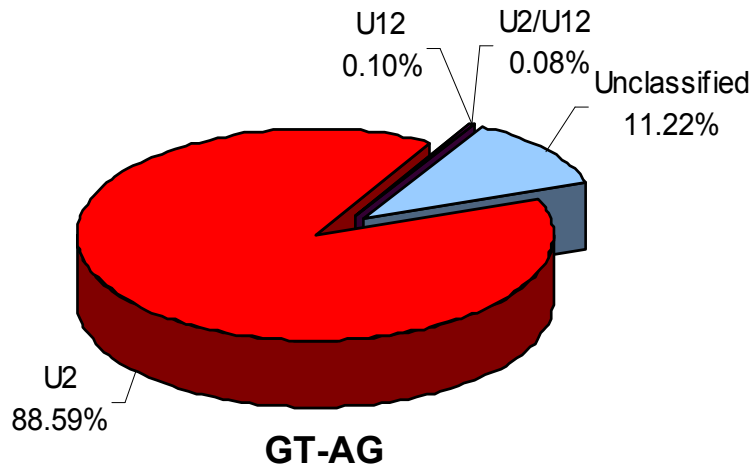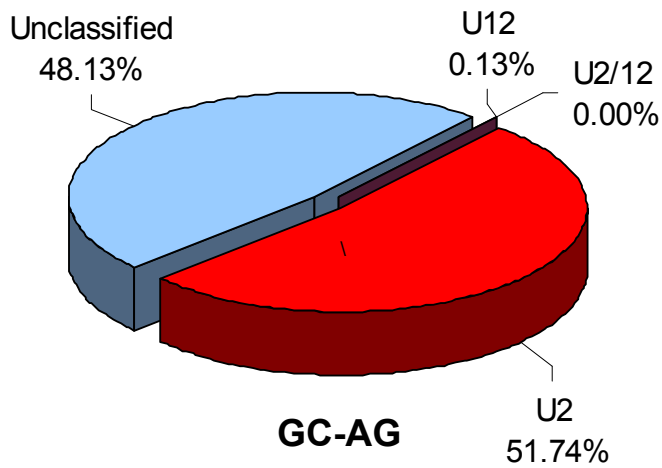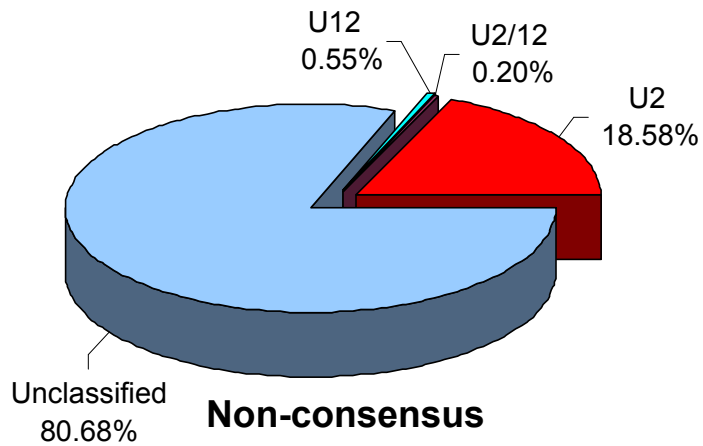

Supplementary Fig. 5

Supplement: SupplementaryFigure5.pdf [file SupplementaryFigure5.pdf]
